# Supplementary material for: Multi-Walled Carbon Nanotube-Assisted Encapsulation Approach for Stable Perovskite Solar Cells
Source: Molecules. 2021 Aug 20;26(16):5060. doi: 10.3390/molecules26165060 (PMC8399998; doi:10.3390/molecules26165060)
Supplement: Supplementary file 1 [file molecules-26-05060-s001.zip › molecules-1321452-supplementary.pdf]

## **Multi-Walled Carbon Nanotube-assisted Encapsulation**

### **Approach for Stable Perovskite Solar Cells**

Jin-Myung Choi<sup>1,2</sup>, Hiroki Suko<sup>3</sup>, Kyusun Kim<sup>1</sup>, Jiye Han<sup>1,2</sup>, Sangsu Lee<sup>1,2</sup>, Yutaka Matsuo<sup>3,4</sup>,

Shigeo Maruyama<sup>3</sup>, Il Jeon<sup>1,2\*</sup>, Hirofumi Daiguji<sup>3\*</sup>

<sup>1</sup>Department of Chemistry Education, Graduate School of Chemical Materials, Crystal Bank Institute, Pusan National University, Busan 46241, South Korea

<sup>2</sup>Department of Nano Fusion Technology, Pusan National University, Busan 46241, Republic of Korea

<sup>3</sup>Department of Mechanical Engineering, School of Engineering, The University of Tokyo, Tokyo 113-8656, Japan

<sup>4</sup>Department of Chemical System Engineering, Graduate School of Engineering, Nagoya University, Nagoya 464-8603, Japan

\* Corresponding author, E-mail address: il.jeon@spc.oxon.org (Prof. I. Jeon), daiguji@thml.t.u-tokyo.ac.jp (Prof. H. Daiguji)

## **Contents**

- 1. Light Absorbance Stability of Devices**
- 2. Encapsulation Approaches**
- 3. Stability of Devices with Different Passivation Structures**
- 4. Devices with Different Structures**
- 5. Devices with Different Applied Pressures**
- 6. Performance of Unencapsulated Devices**
- 7. Images of MWNT added UV-epoxy resin**
- 8. WVTR Data**
- 9. WVTR Sample Preparation**
- 10. OTR Data**
- 11.  $J_{sc}$  and  $V_{oc}$  during Stability Test**
- 12. Performance of 0.5 wt% MWNT-added Encapsulated Devices**
- 13. Stability of 0.2 wt% MWNT-added Encapsulated Devices**

## 1. Light Absorbance Stability of Devices

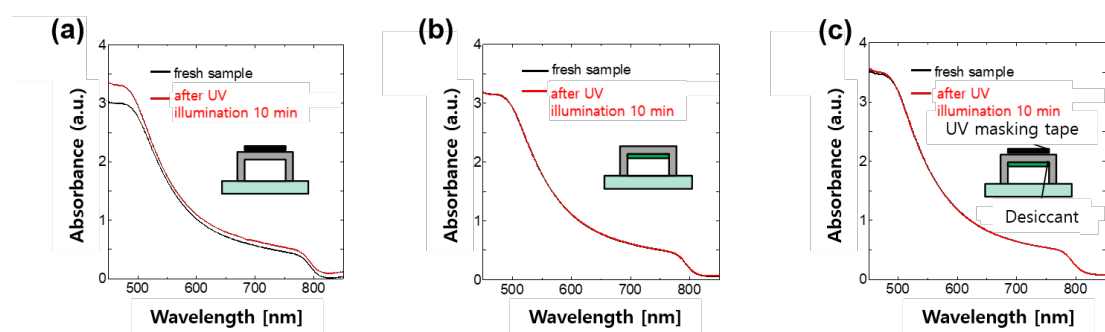

**Figure S1.** (a–c) Light absorbance of the perovskite film before and after UV illumination for 10 minutes in three different encapsulation structures: (a) with a UV masking, (b) with a desiccant (getter), and (c) with both a UV masking and a desiccant.

## 2. Encapsulation Approaches

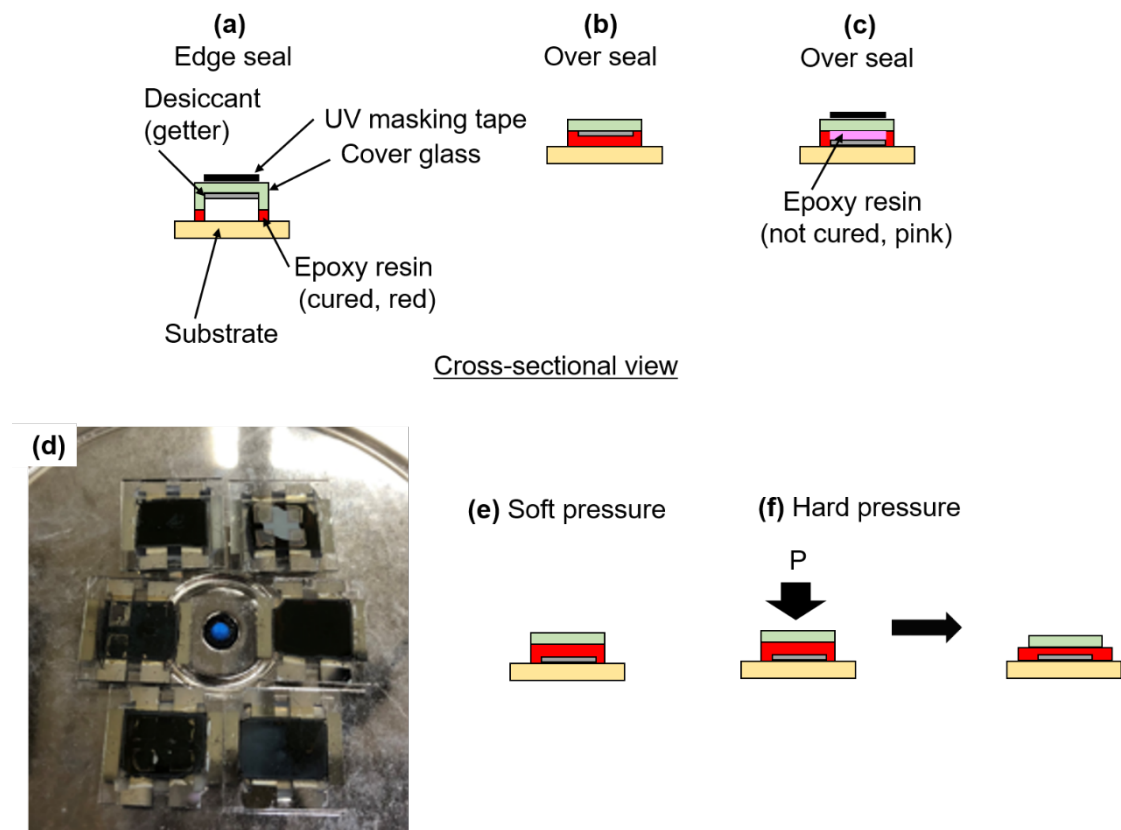

**Figure S2.** (a–c) Three different encapsulation structures: (a) edge sealing with both a desiccant and a UV masking tape, (b) over sealing with only a desiccant, and (c) over sealing with both a desiccant and a UV masking tape, which leaves the centre of epoxy resin not cured; (d) Photographic image of the devices made by the suggested structures; (e–f) Two different pressures applied during the packaging.

### 3. Stability of Devices with Different Passivation Structures

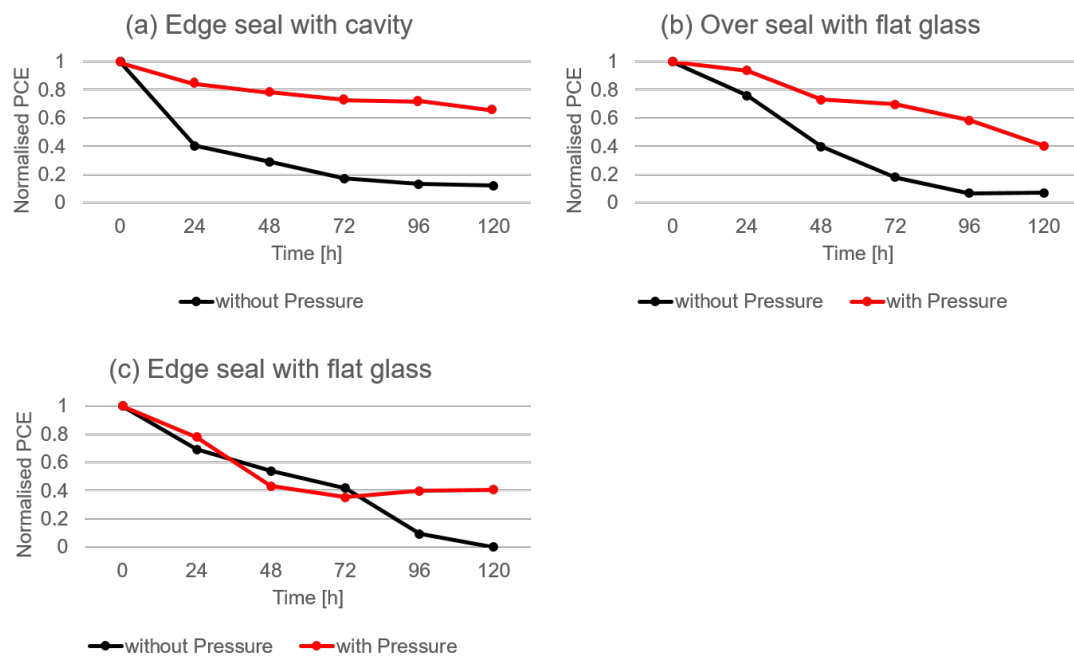

**Figure S3.** Normalised power conversion efficiency of the (a) edge seal with cavity; (b) over seal with flat glass; and (c) edge seal with flat glass during 120 min stability test.

#### 4. Devices with Different Structures

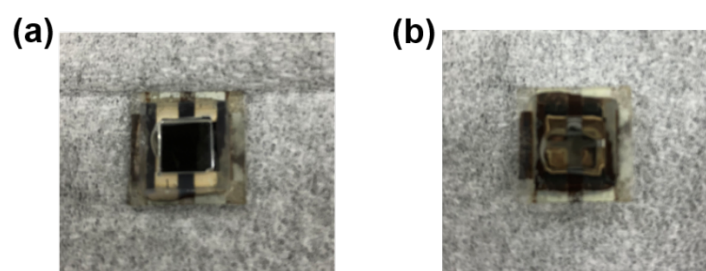

**Figure S4.** Photographic images of (a) edge seal- and (b) over seal-encapsulated samples.

## 5. Devices with Different Applied Pressures

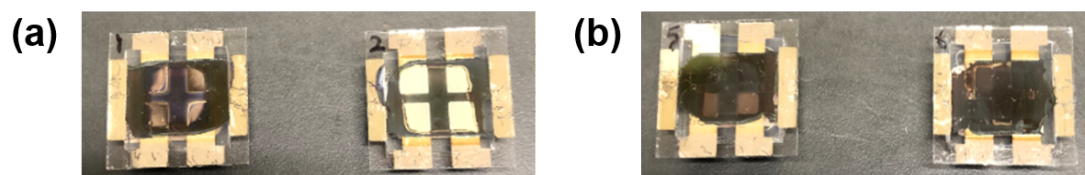

**Figure S5.** Images before and after one week of durability testing: (a) 4.90 N cm<sup>-2</sup> pressure- and (b) 14.71 N cm<sup>-2</sup> pressure-encapsulated perovskite solar cells.

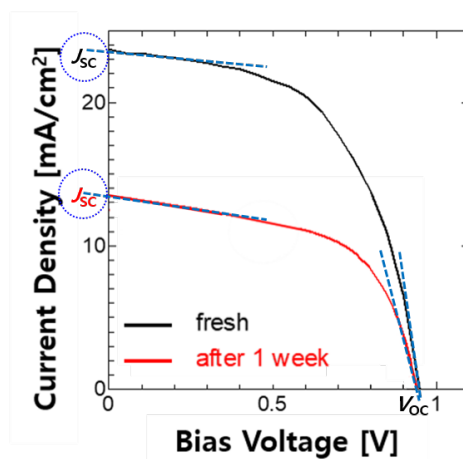

**Figure S6.**  $J$ - $V$  curves of the encapsulated PSCs under 14.71 N cm<sup>-2</sup> with a nitrogen gun blown constantly during the stability test to keep the device temperature low.

## 6. Performance of Unencapsulated Devices

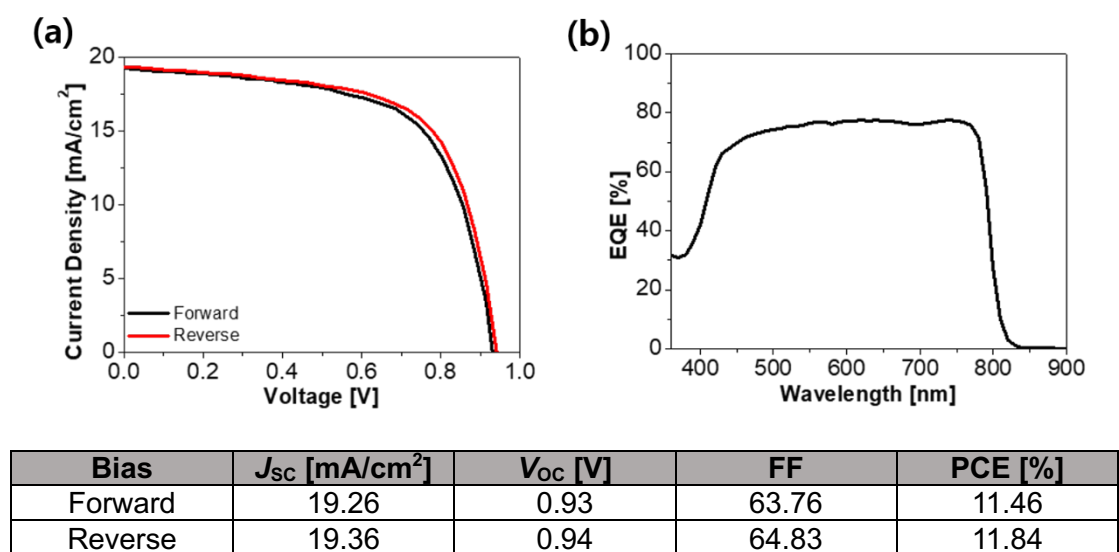

**Figure S7.** (a) Forward and reverse bias  $J$ - $V$  curves, (b) EQE, and photovoltaic table of the unencapsulated PSCs,

## 7. Images of MWNT-added UV-epoxy resin

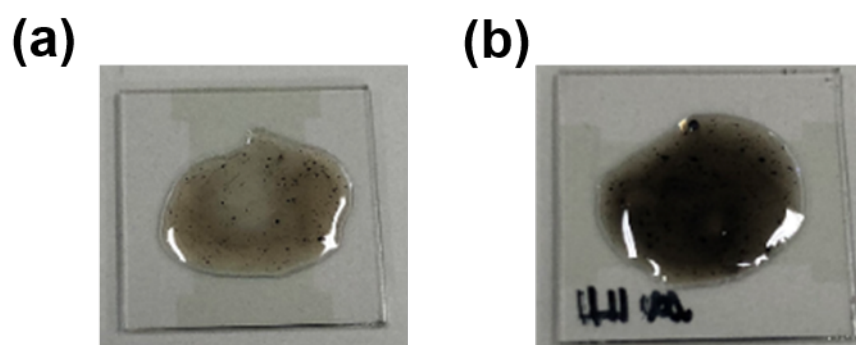

**Figure S8.** Images of (a) 0.5-wt%; and (b) 1.5-wt% multi-walled nanotube (MWNT)-added UV epoxy resin.

## 8. Water vapour transmittance rate (WVTR) Data

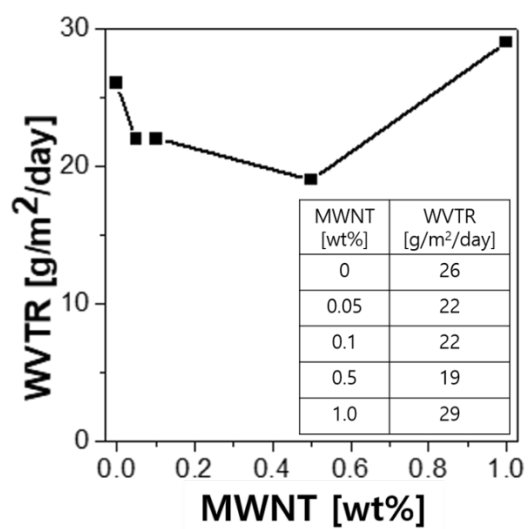

**Figure S9.** Water vapour transmittance rate (WVTR) of the MWNT-added UV epoxy resin with respect to the wt% of the MWNT.

## 9. WVTR Sample Preparation

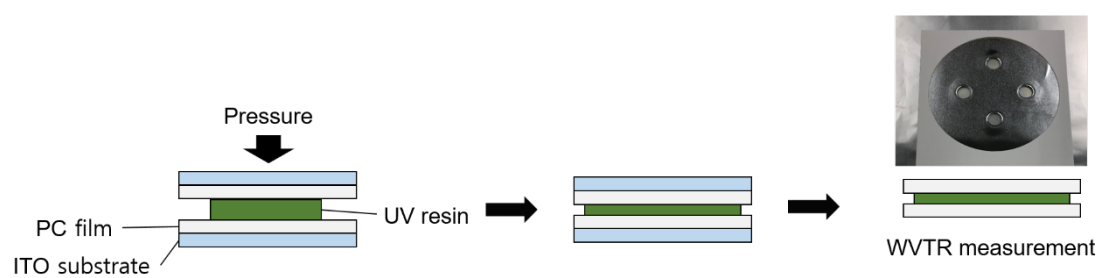

**Figure S10.** Schematic of the sample preparation for the WVTR measurement.

## 10. Oxygen transmittance rate (OTR) Data

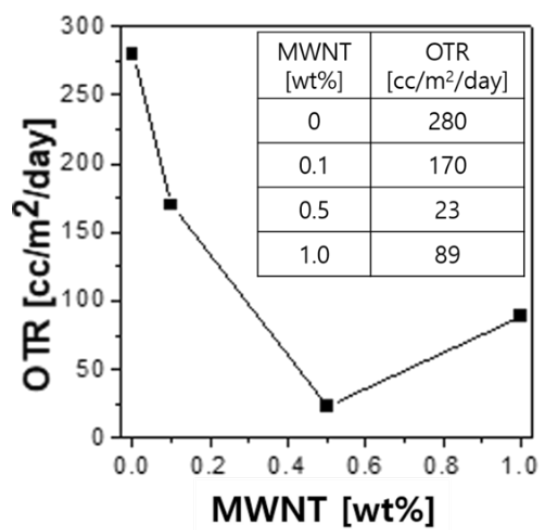

**Figure S11.** Oxygen transmittance rate (OTR) of the MWNT-added UV epoxy resin with respect to the  $\text{wt}\%$  of the MWNT.

## 11. $J_{sc}$ and $V_{oc}$ during Stability Test

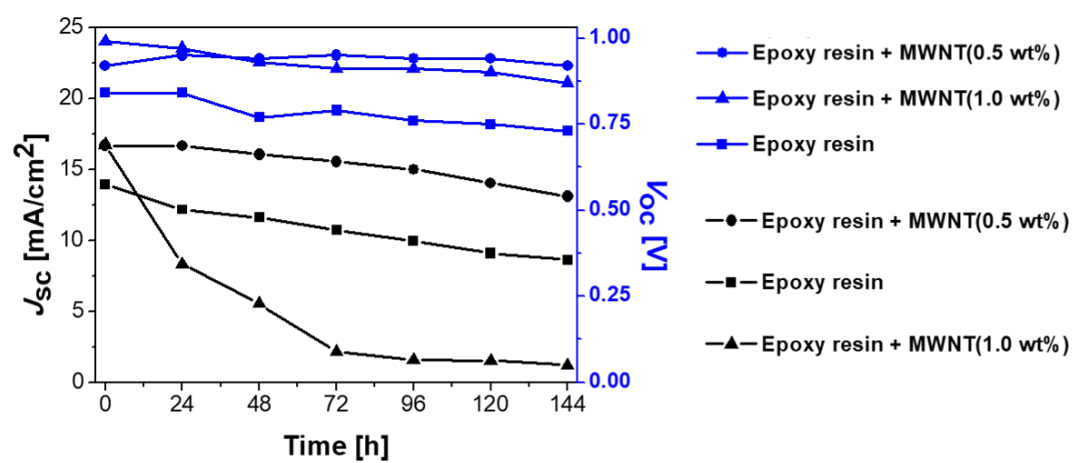

**Figure S12.**  $J_{sc}$  and  $V_{oc}$  of the 0, 0.5, and 1.0 wt% of MWNT-added UV epoxy resin.

## 12. Performance of 0.5 wt% MWNT-added Encapsulated Devices

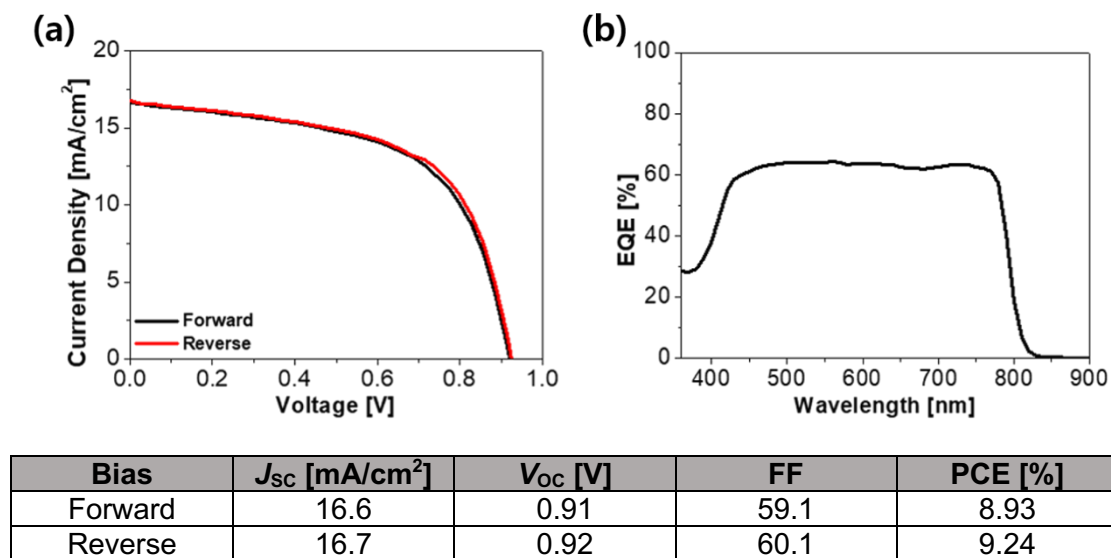

**Figure S13.** (a) Forward and reverse bias  $J$ - $V$  curves, (b) EQE, and photovoltaic table of the 0.5 wt% MWNT-added encapsulated PSCs.

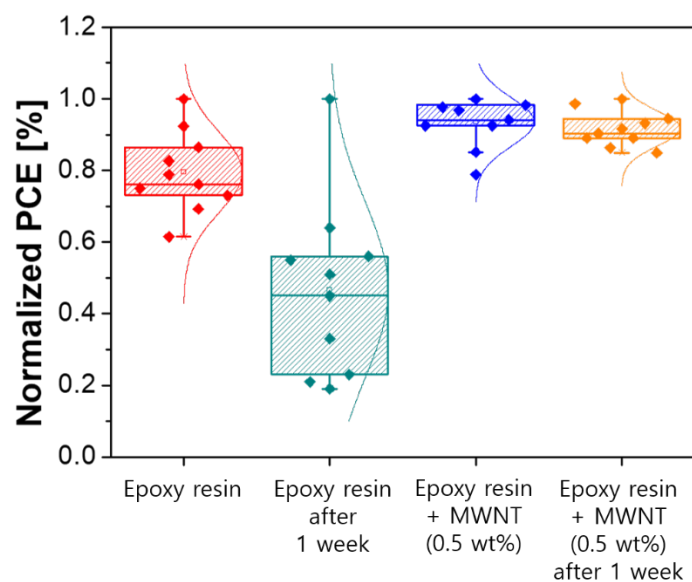

**Figure S14.** Statistical analysis of the 0.5 wt% MWNT-added encapsulated PSCs before and after the stability test.

### 13. Stability of 0.2 wt% MWNT-added Encapsulated Devices

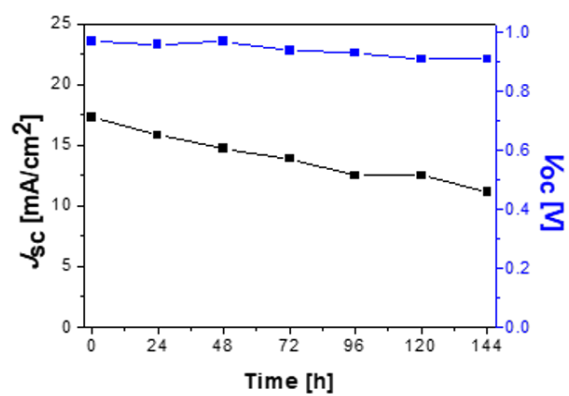

**Figure S15.** Stability of the 0.2 wt% MWNT-added Encapsulated Devices.
